# Supplementary material for: Conversion of mouse fibroblasts into oligodendrocyte progenitor-like cells through a chemical approach
Source: PubMed Central journal article supplement (PMC6604601; doi:10.1093/jmcb/mjy088), 2019-01-10
Supplement: mjy088_supplementary.pdf [file mjy088_supplementary.pdf]

# Figure S1

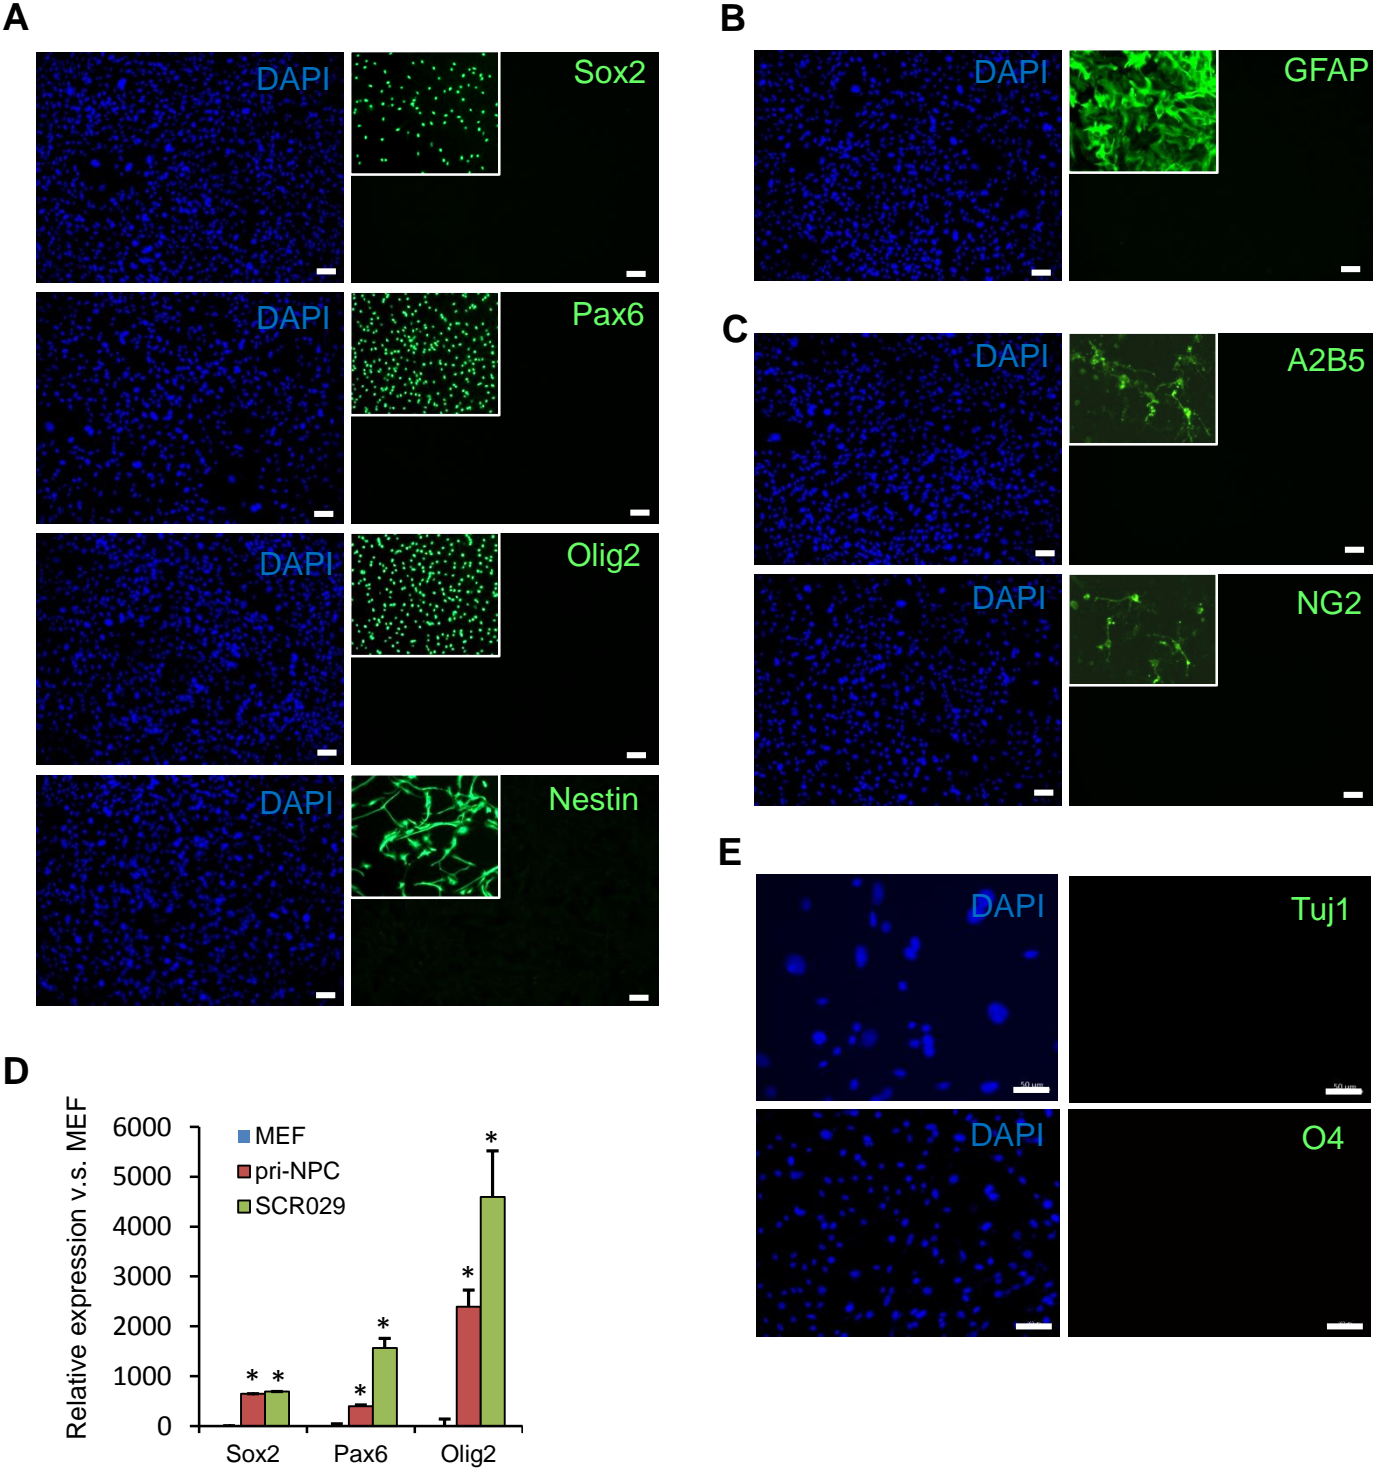

1 **Figure S1. Characterization of MEFs Used for Chemical Reprogramming**

2 (A, B and C) Immunostaining analysis showing that the starting MEFs are negative for NSC  
3 markers Sox2, Pax6, Olig2, Nestin (A), astroglial marker GFAP (B), and OPC markers A2B5  
4 and NG2 (C). The insets show positive controls for the antibodies. All scale bar, 50  $\mu$ m.

5 (D) qRT-PCR analysis showing the expression of indicated neural genes in MEFs. Primary  
6 NSCs (pri-NSC) and neural stem cell line SCR029 served as positive controls. Relative  
7 expression was normalized to MEFs. Data are represented as mean $\pm$ SEM. \*  $p < 0.001$ .

8 (E) Immunostaining analysis showing the differentiation potentials for MEFs towards  
9 neurons (Tuj1) and oligodendrocytes (O4). Scale bar is 50  $\mu$ m in the upper panel, and 100  
10  $\mu$ m in bottom panel.

11

12

13

14

15

16

17

18

19

20

21

22

23

24

# Figure S2

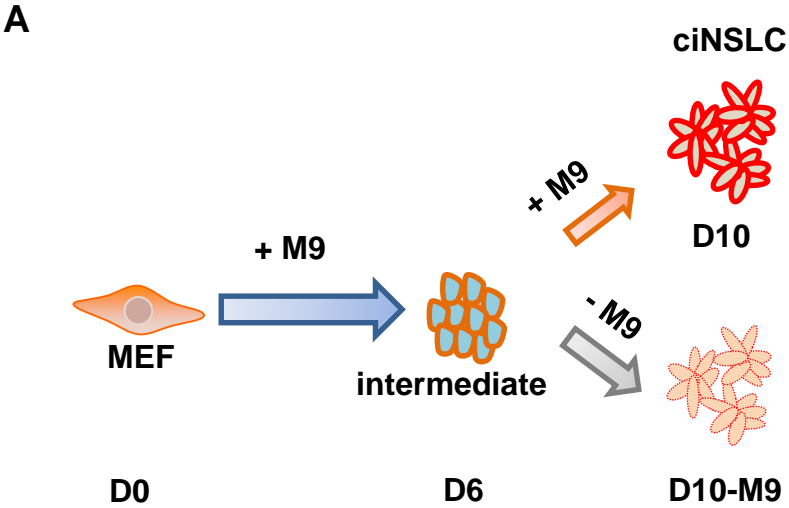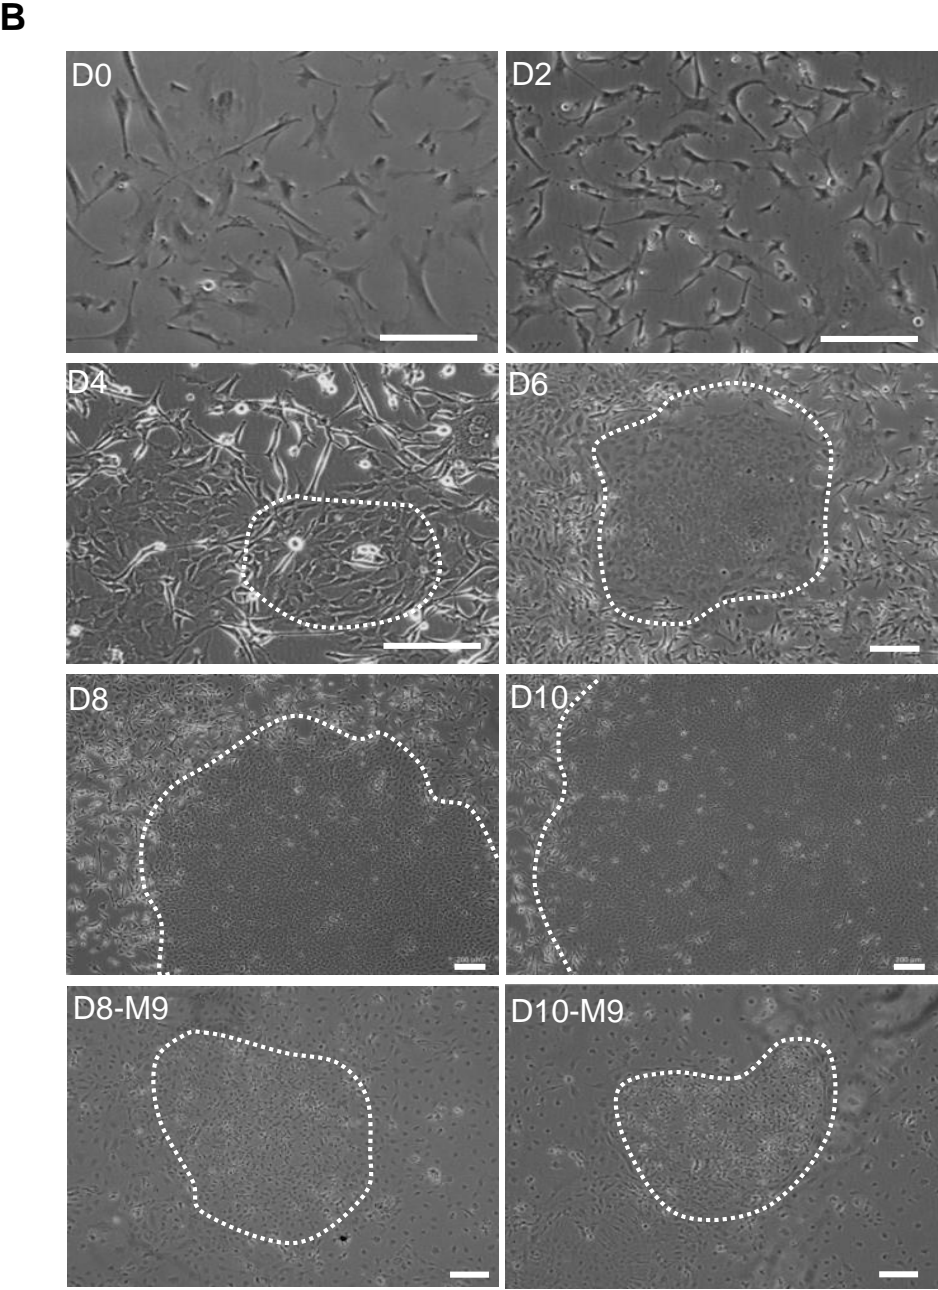

1 **Figure S2. M9 Induces the Generation of METed Colonies**

2 (A) A schematic diagram describing the generation, and the differentiation potential, of  
3 reprogramming intermediate induced by M9 at the early stage of reprogramming.

4 (B) Morphology of the METed colonies induced in the presence of M9 at day 2, day 4, day 6,  
5 day 8 and day 10 (D2, D4, D6, D8, and D10), or withdraw M9 from day 6 onwards (D8-M9  
6 and D10-M9, M9 was withdraw from D6 and the morphology of the METed colony was  
7 recorded by day 8 or day 10, respectively). All scale bar, 200  $\mu\text{m}$ .

8

9

10

11

12

13

14

15

16

17

18

19

20

21

22

23

24

**Figure S3**

**A**

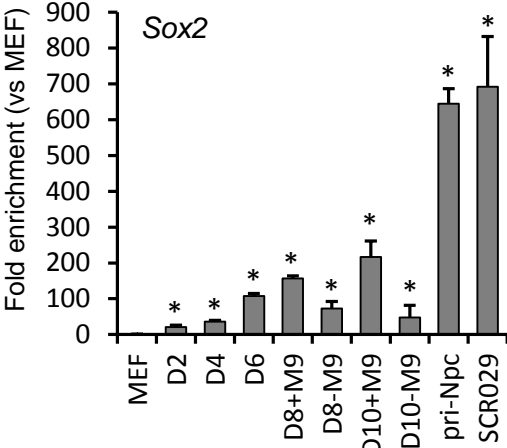

**B**

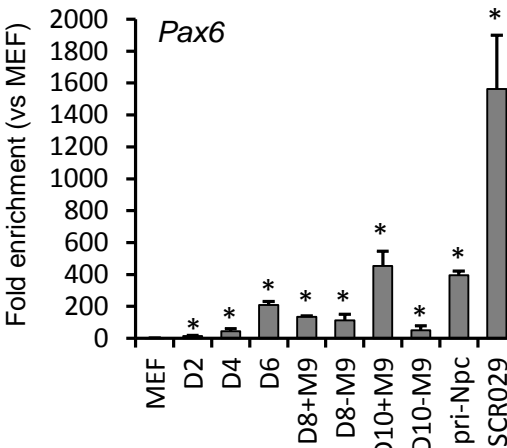

**C**

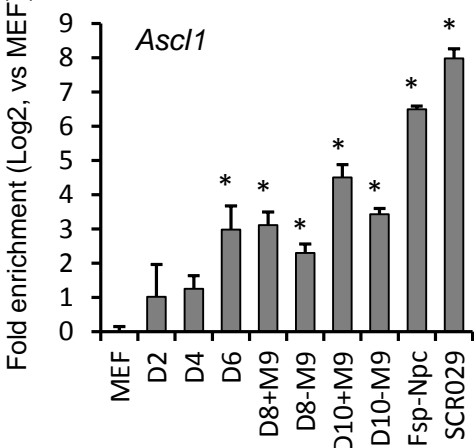

**D**

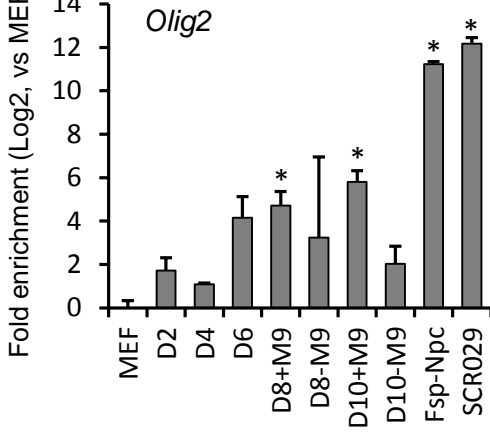

**E**

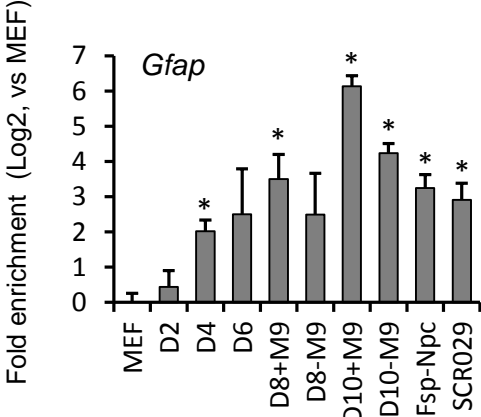

**F**

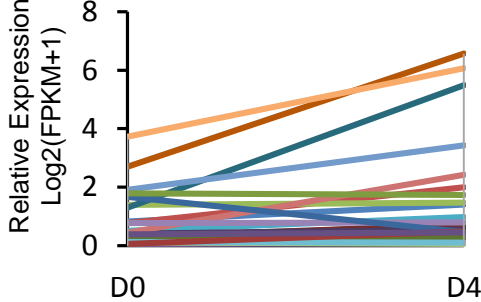

1 **Figure S3. Gene Expression Analysis of Neural Genes**

2 (A-E) qRT-PCR analysis showing the relative expression of neural genes at indicated time  
3 points. Relative expression was normalized to MEFs. Data are represented as mean±SEM,  
4 n=3. \*  $p < 0.001$ .

5 (F) RNA-seq results (day 4 and day 0) showing the relative expression of 22 neural genes.

6

7

8

9

10

11

12

13

14

15

16

17

18

19

20

21

22

23

24

25

**Figure S4**

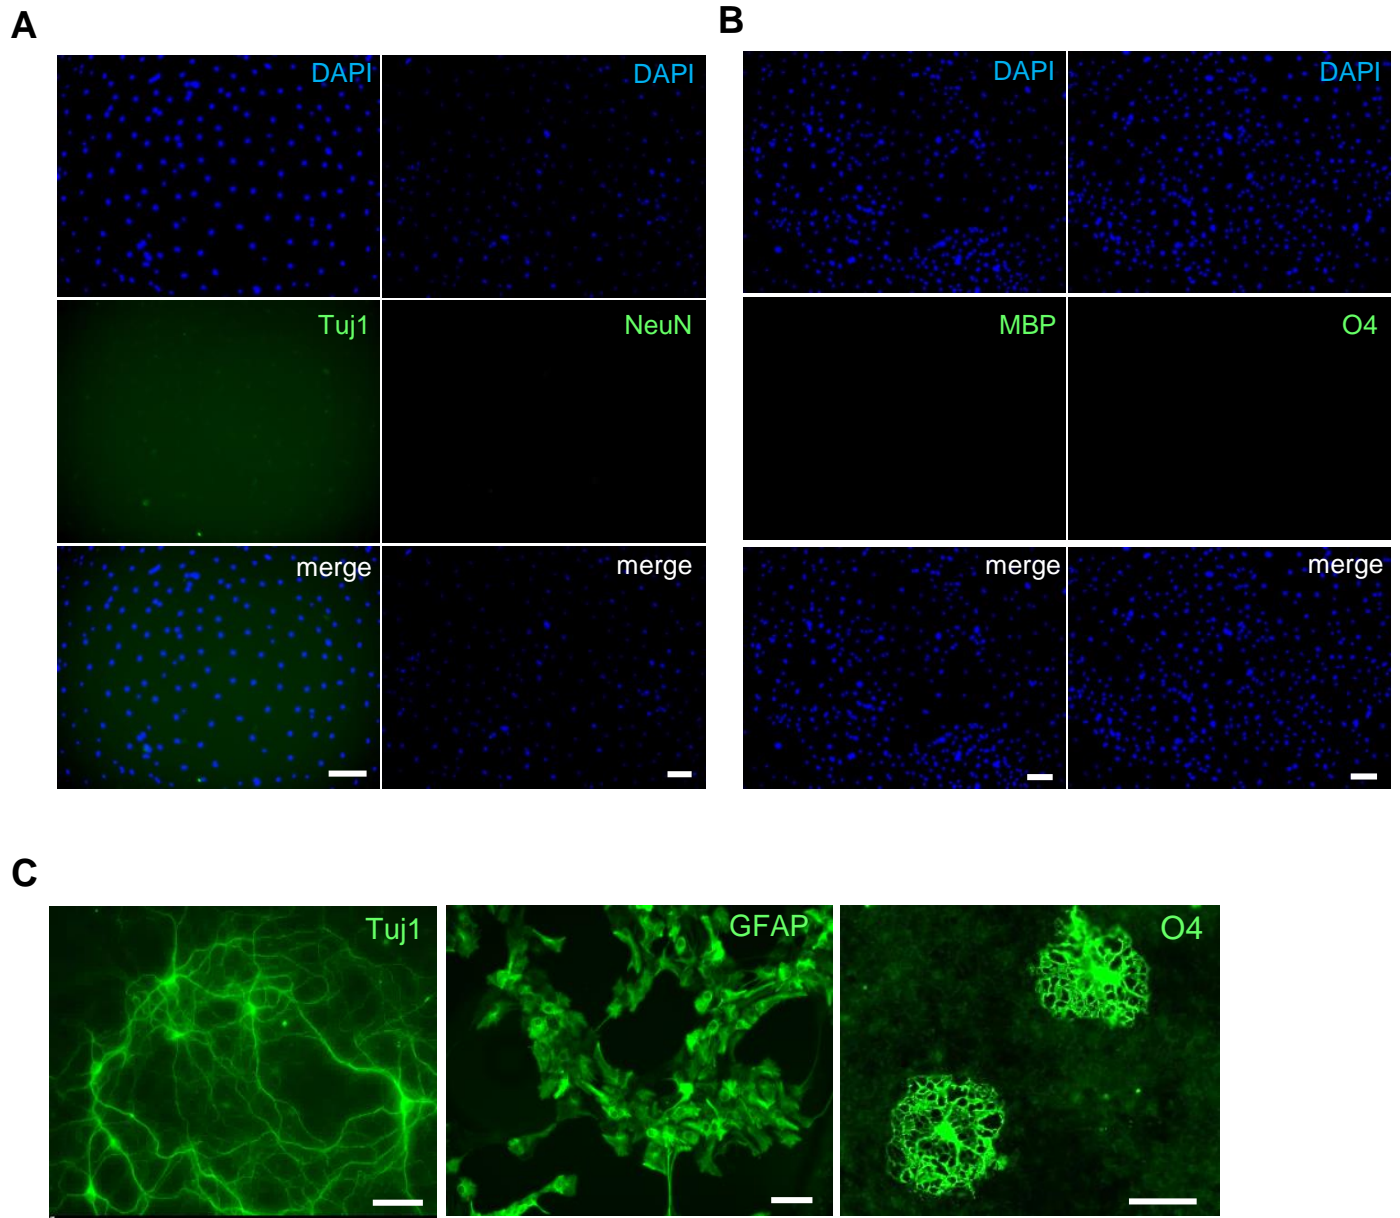

1 **Figure S4. Differentiation Potentials of M9-Induced Intermediate Cells**

2 Immunostaining analysis showing the M9-induced intermediate cells at day 6 are not able to  
3 generate neurons, indicated by Tuj1 and NeuN staining (A), or OLs, indicated by MBP and  
4 O4 staining (B). All scale bar, 100  $\mu\text{m}$ .

5 (C) Immunostaining analysis showing the differentiation potentials for primary neural stem  
6 cells towards neurons (Tuj1) astrocytes (GFAP), and oligodendrocytes (O4). All scale bar, 50  
7  $\mu\text{m}$ .

8

9

10

11

12

13

14

15

16

17

18

19

20

21

22

23

24



**Figure S5**

**A**

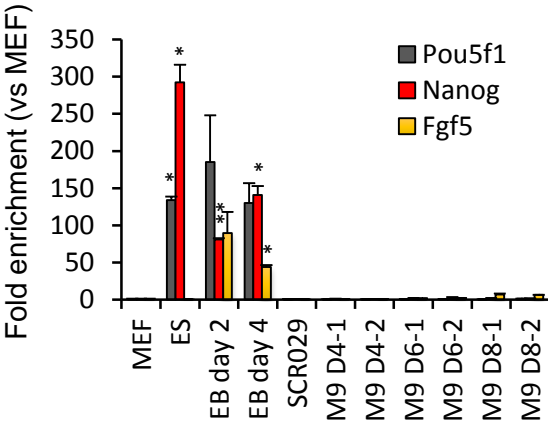

**B**

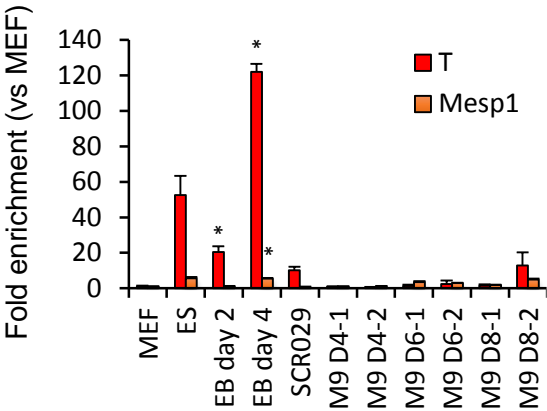

**C**

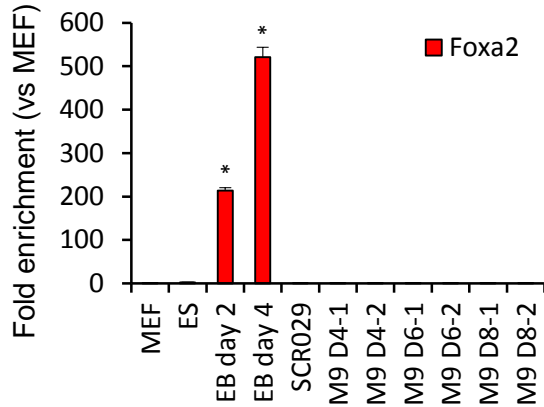

**D**

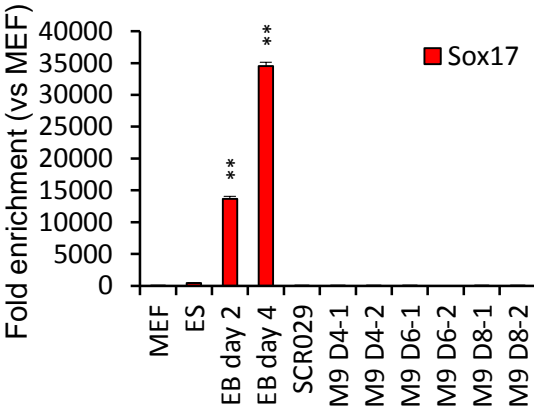

**E**

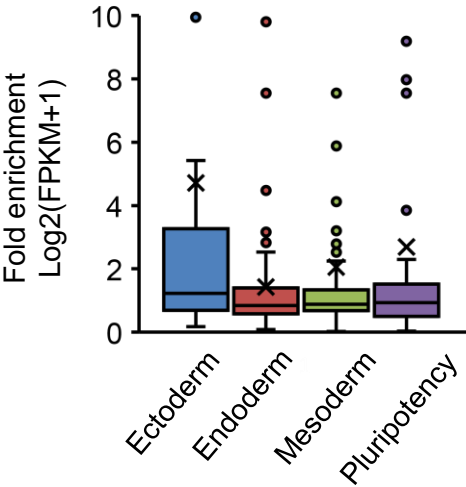

1 **Figure S5. Gene Expression Analysis of Lineage-Specific Genes**

2 (A-D) qRT-PCR analysis showing the expression of genes for pluripotency (A), mesoderm  
3 (B) and endoderm (C, D), respectively, at indicated time points. EB, embryoid body. Relative  
4 expression was normalized to MEFs. Data are represented as mean±SEM. \*  $p<0.01$ , \*\*  
5  $p<0.001$ .

6 (E) Box plots showing the fold enrichment of the expression of genes for ectoderm,  
7 endoderm, mesoderm and pluripotency (day 4 v.s. day 0).

8

9

10

11

12

13

14

15

16

17

18

19

20

21

22

23

24

25

**Figure S6**

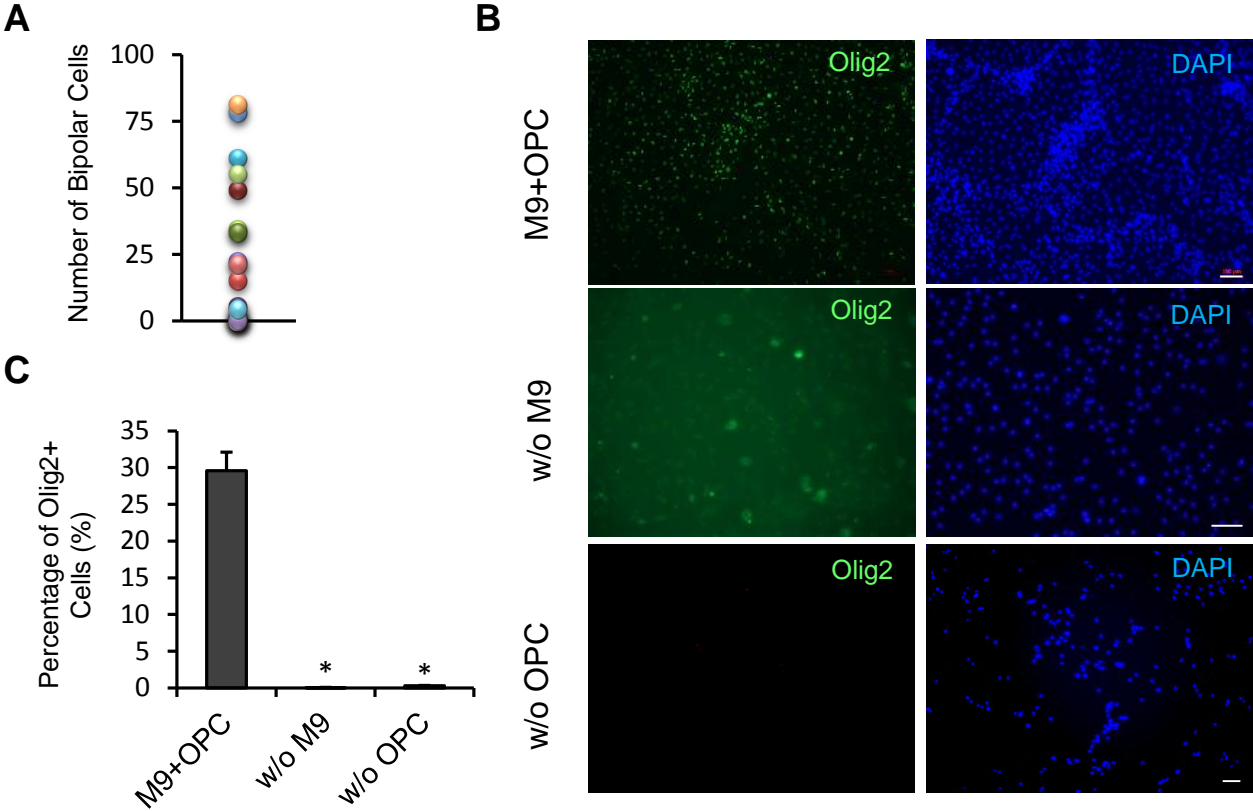

1 **Figure S6. Characterization of Reprogramming Conditions**

2 (A) Dot plot showing the quantification of the numbers of bipolar cells by counting 18  
3 randomly picked 10× visual fields from three independent experiments (6 fields for each  
4 experiment).  
5 (B and C) Immunostaining showing the Olig2-positive cells (B) and the quantification (C) by  
6 day 14 under the conditions with M9 and OPC treatment (upper panel), without M9 for the  
7 first 6 days (middle panel), or without OPC specification after day 6 (bottom panel). All scale  
8 bar, 100 μm. \*  $p < 0.01$ .

9  
10  
11  
12  
13  
14  
15  
16  
17  
18  
19  
20  
21  
22  
23  
24

**Figure S7**

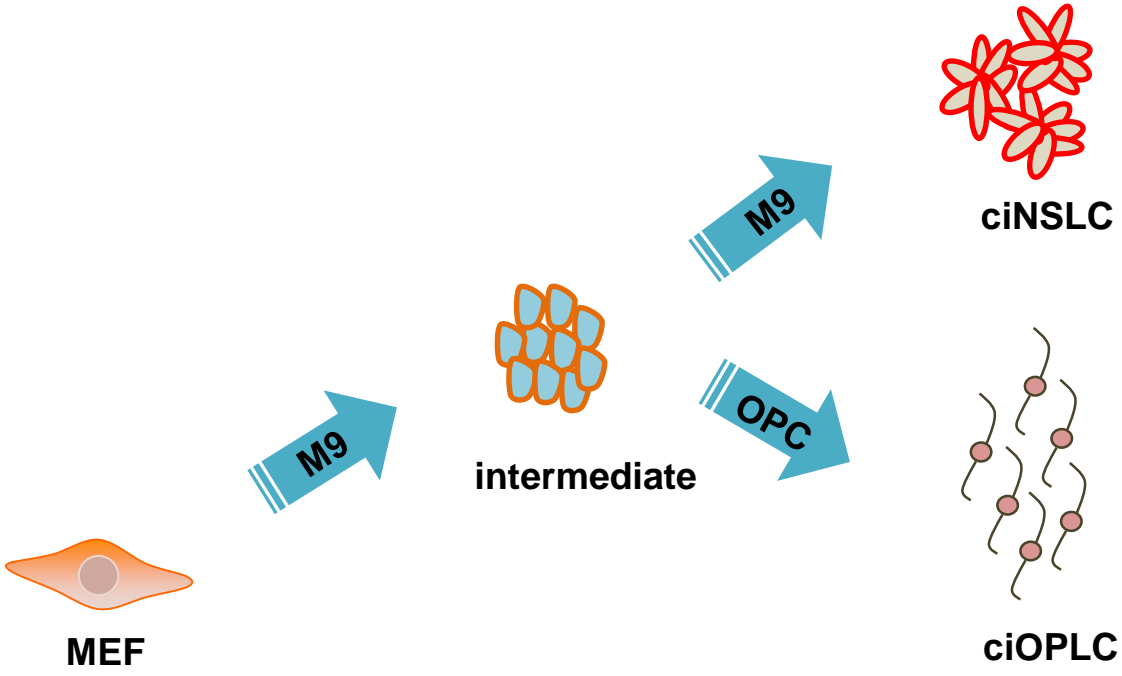

1 **Figure S7. Working Model of ciOPLC Reprogramming**

2 Similar with previously described TFs-mediated Cell Activation and Signaling Directed  
3 reprogramming paradigm, chemical condition could activate fibroblasts into an epigenetically  
4 active state (the METed colony), which could be re-directed to alternative OPC fate in  
5 appropriate culture conditions.

6

7

8

9

10

11

12

13

14

15

16

17

18

19

1 **SUPPLEMENTARY TABLES**

2 **Supplementary Table S1. Chemicals included in M9 cocktail**

| Chemical      | Function                                                                                                                         | Structure                                                                            | Working Con. | M.W.   |
|---------------|----------------------------------------------------------------------------------------------------------------------------------|--------------------------------------------------------------------------------------|--------------|--------|
| CHIR99021     | Highly potent and selective GSK-3 inhibitor                                                                                      | 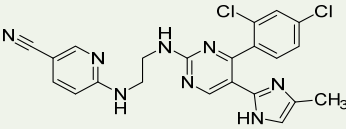   | 3 $\mu$ M    | 465.34 |
| LDN193189     | Cell permeable BMP type I receptors ALK2/ALK3 inhibitor                                                                          |    | 100 nM       | 406.48 |
| A83-01        | Potent inhibitor of TGF- $\beta$ type I receptor ALK5 kinase, type I Activin/Nodal receptor ALK4 and type I nodal receptor ALK7. |   | 0.5 $\mu$ M  | 421.52 |
| Parnate       | Irreversible inhibitor of lysine-specific demethylase 1 and monoamine oxidase                                                    |   | 2 $\mu$ M    | 169.65 |
| RG108         | Non-nucleoside DNA methyltransferase inhibitor                                                                                   |  | 10 $\mu$ M   | 334.3  |
| Retinoic Acid | Endogenous agonist for retinoic acid receptors and retinoid X receptor                                                           |  | 1 $\mu$ M    | 300.44 |

|           |                                     |                                                                                    |             |        |
|-----------|-------------------------------------|------------------------------------------------------------------------------------|-------------|--------|
| SMER28    | Positive regulator of autophagy     | 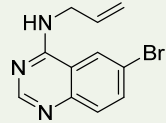  | 10 $\mu$ M  | 264.12 |
| Hg-Ag 1.5 | Potent Hedgehog pathway Smo agonist |  | 0.5 $\mu$ M | 526.04 |

1

2

3

4

5

6

7



1 **Supplemental Table S2. Primary Antibodies Used in This Study**

| Antigen            | Antibody Type | Company     | Cat No     |
|--------------------|---------------|-------------|------------|
| Tuj1               | mouse mAb     | Covance     | MMS-435P   |
| Nestin             | mouse IgG2a   | R&D         | MAB2736    |
| Pax6               | Rabbit        | Covance     | PRB-278P   |
| GFAP               | rabbit        | Dako        | z0334      |
| Olig2              | rabbit        | Millipore   | AB9610     |
| O4                 | mouse mAb     | R&D         | MAB1326    |
| MBP                | mouse         | Convance    | SMI99P     |
| MAG                | mouse         | Millipore   | MAB1567    |
| MOG                | mouse         | Millipore   | MAB5680    |
| NG2                | rabbit        | Millipore   | AB5320     |
| A2B5               | mouse         | R&D         | MAB1416    |
| PDGFRa             | mouse         | eBioscience | 17-1401-81 |
| Nkx2.2             | mouse         | DSHB        | 74.5A5     |
| Isotype control Ab | mouse         | eBioscience | 17-4321-81 |

2

3

1 **Supplemental Table S3. Quantitative PCR Primers Used in this Study**

|               |                |                            |
|---------------|----------------|----------------------------|
| <i>Gapdh</i>  | forward primer | catggccttccgtgttccta       |
|               | reverse primer | gcctgcttcaccaccttctt       |
| <i>Sox2</i>   | forward primer | gaacgccttcatggatggt        |
|               | reverse primer | ttgctgatctccgagttgtg       |
| <i>Gfap</i>   | forward primer | cggagacgcatcacctctg        |
|               | reverse primer | agggagtggaggagtcatcgc      |
| <i>Olig2</i>  | forward primer | ggcgggtggcttcaagtcac       |
|               | reverse primer | tagtttcgcgccagcagcag       |
| <i>Ascl1</i>  | forward primer | agggatcctacgacctctta       |
|               | reverse primer | accagttgtaaagtccagcag      |
| <i>Pax6</i>   | forward primer | agggggagagaacaccaact       |
|               | reverse primer | catttggccttcgattaga        |
| <i>Nkx2.2</i> | forward primer | gcagcgacaaccctaca          |
|               | reverse primer | acttggagctcgagtcttgg       |
| <i>Mbp</i>    | forward primer | taccctggctaaagcagagc       |
|               | reverse primer | gggagccgtagtgggtagtt       |
| <i>Plp1</i>   | forward primer | ctgccagtctattgccttcc       |
|               | reverse primer | agcattccatgggagaacac       |
| <i>Sox6</i>   | forward primer | caaaggacgaaaggaggaaa       |
|               | reverse primer | ggatttccagcgagatccta       |
| <i>Pou5f1</i> | forward primer | ctgagggccaggcaggagcacgag   |
|               | reverse primer | ctgtagggagggtctcgggcactt   |
| <i>Nanog</i>  | forward primer | aag cag aag atg cgg act gt |
|               | reverse primer | atc tgc tgg agg ctg agg ta |
| <i>Fgf5</i>   | forward primer | ccttgcgaccaggagctta        |
|               | reverse primer | ccgtctgtggttctgttgagg      |
| <i>Foxa2</i>  | forward primer | aagggaatgagaggctgagtgga    |
|               | reverse primer | atgacagatcactgtggcccatct   |
| <i>T</i>      | forward primer | ttgaactttcctccatgtgctga    |
|               | reverse primer | tccaagagcctgccacttt        |
| <i>Mesp1</i>  | forward primer | accatcgttccagtacgc         |
|               | reverse primer | agcatgtcgtgctgaaga         |
| <i>Sox17</i>  | forward primer | tgccctttgtgtataagcccgaga   |
|               | reverse primer | gggtagttgcaatagtagaccgct   |

2

3

## 1 **SUPPLEMENTAL INFORMATION**

### 2 **Materials and Methods**

#### 3 **Mouse Embryonic Fibroblasts Preparations**

4 Procedures involving mice were approved by the Animal Care and Use Committee at the  
5 Shanghai Jiao Tong University School of Medicine. Mouse embryonic fibroblasts (MEFs)  
6 were prepared as reported (Zhang et al., 2016). In brief, E13.5 mouse embryos with the  
7 desired genotype were collected and their neural tissues (including head, spinal cord, and  
8 tail) and internal organs (including reproductive organs) were carefully removed. The  
9 remaining tissues were sliced into small pieces, trypsinized, plated in MEF medium, and  
10 cultured in 5% CO<sub>2</sub> and 20% O<sub>2</sub> at 37°C. All fibroblasts were expanded for two passages  
11 before being used for experiments. To prepare tdMEFs, the resulting fibroblasts were  
12 sorted for tdTomato<sup>+</sup>/p75<sup>-</sup> cells by fluorescence-activated cell sorting (FACS).

13

#### 14 **RNA Preparation and RT-PCR**

15 Total RNA was extracted using the RNeasy Plus mini kit (Qiagen). Reverse transcription  
16 and PCR were performed as described. In brief, 1 µg total RNA was used for reverse  
17 transcription reactions with the iScript cDNA synthesis kit (Bio-Rad), and the resulting  
18 cDNA was diluted five times in H<sub>2</sub>O for PCR. For semi-quantitative PCR, 1 µl of  
19 1/5-diluted cDNA was used as a template for the PCR program: 95°C for 5 min, 35  
20 cycles of 95°C for 30 s, 60°C for 30 s, and 72°C for 30 s, and then 72°C for 10 min.  
21 Quantitative PCR was performed following the protocol of FAST SYBR Green Master  
22 Mix (Applied Biosystems). All PCR was performed in triplicate, and the expression of

1 individual genes was normalized to that of *Gapdh*. The primer sequences are listed in  
2 Supplemental Table S3.

3

#### 4 **FACS Cytometry**

5 Cells were washed twice with 1×DPBS and detached with accutase treatment at 37°C for  
6 5 min. After harvesting, cells were passed through a 70-µm filter and washed twice with  
7 and resuspended into pre-cooled FACS buffer (1×DPBS, 1.5% FBS, 0.5% BSA). Cells  
8 were incubated with specific antibodies or isotype control with the suggested  
9 concentrations on ice for 45 min, followed by six washes with FACS buffer for sorting.  
10 Cells were then resuspended into FACS buffer and sorted with a BD FACSAris II.  
11 Antibodies used in this study are listed in Supplemental Table S2.

12

13
